# Supplementary material for: Combining Structural Optimization and Process Assurance in Implicit Modelling for Casting Parts
Source: MDPI journal article supplement (doi:10.3390/ma14133715), 2021-07-02
Supplement: s1 [file s1]

**Table S1.** Material parameters used in the process simulation. The material properties are derived by the Flow-3D database.

| Material        | Parameter                     | Value                         |
|-----------------|-------------------------------|-------------------------------|
| A380 (AlSi9Cu3) | Density (Liquid)              | 2460 $\frac{kg}{m^3}$         |
|                 | Specific heat (Liquid)        | 1245.3 $\frac{J}{kg \cdot K}$ |
|                 | Thermal conductivity (Liquid) | 104 $\frac{W}{m \cdot K}$     |
|                 | Fluid viscosity               | 0.0012 $\frac{kg}{m \cdot s}$ |
|                 | Solidus temperature           | 497.3 °C                      |
|                 | Liquidus temperature          | 574.4 °C                      |

**Table S2.** Material parameters used in the LPDC simulation derived by the Flow-3D database.

| Material (Source: Flow3D) | Parameter                     | Value                                                    |
|---------------------------|-------------------------------|----------------------------------------------------------|
| A356 (AlSi7Mg0.3)         | Density (Liquid)              | 2437 $\frac{kg}{m^3}$                                    |
|                           | Specific heat (Liquid)        | 1074 $\frac{J}{kg \cdot K}$                              |
|                           | Thermal conductivity (Liquid) | 81.4 – 197.2 $\frac{W}{m \cdot K}$                       |
|                           | Fluid viscosity               | 0.0019 $\frac{kg}{m \cdot s}$                            |
|                           | Solidus temperature           | 552.4 °C                                                 |
|                           | Liquidus temperature          | 608 °C                                                   |
|                           | Latent heat                   | 4.322 · 10 <sup>5</sup> $\frac{J}{kg}$                   |
| H-13                      | Density x specific heat       | 3.561 · 10 <sup>6</sup> $\frac{kg}{m \cdot s^2 \cdot K}$ |
|                           | Thermal conductivity          | 28.6 $\frac{W}{m \cdot K}$                               |
|                           | Temperature                   | 350 °C                                                   |
| Ceramic                   | Density x specific heat       | 1.800 · 10 <sup>6</sup> $\frac{kg}{m \cdot s^2 \cdot K}$ |
|                           | Thermal conductivity          | 1.09 $\frac{W}{m \cdot K}$                               |
|                           | Temperature                   | 700 °C                                                   |

**Table S3.** Heat transfer coefficients for the LPDC process simulation.

| Material 1       | Material 2   | Heat Transfer Coefficient    |
|------------------|--------------|------------------------------|
| Liquid metal     | Void region  | 30 $\frac{W}{m^2 \cdot K}$   |
| Liquid metal     | Mold         | 1485 $\frac{W}{m^2 \cdot K}$ |
| Liquid metal     | Ceramic tube | 2 $\frac{W}{m^2 \cdot K}$    |
| Solidified metal | Void region  | 30 $\frac{W}{m^2 \cdot K}$   |
| Solidified metal | Mold         | 3000 $\frac{W}{m^2 \cdot K}$ |

---

|                  |              |                            |
|------------------|--------------|----------------------------|
| Solidified metal | Ceramic tube | 1 $\frac{W}{m^2 \cdot K}$  |
| Mold             | Void region  | 30 $\frac{W}{m^2 \cdot K}$ |
| Mold             | Ceramic tube | 5 $\frac{W}{m^2 \cdot K}$  |
| Ceramic tube     | Void region  | 30 $\frac{W}{m^2 \cdot K}$ |

---
